# Supplementary material
Source: Springer Nature journal article supplement (https://www.springermedizin.de/resource/supplementary/12931_2013_1414_MOESM4_ESM.pdf/9425950)

**A**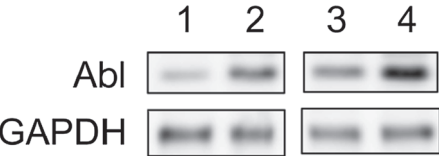**B**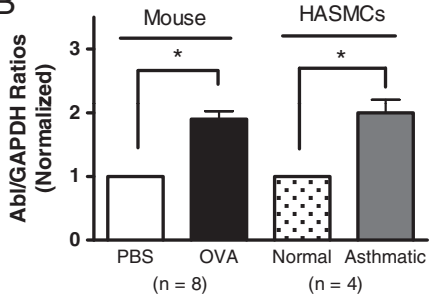

Supplement: MOESM4 [file 9425950]
